# Supplementary material for: The Association between ABCG2 421C>A (rs2231142) Polymorphism and Rosuvastatin Pharmacokinetics: A Systematic Review and Meta-Analysis
Source: MDPI journal article supplement (doi:10.3390/pharmaceutics14030501), 2022-02-24
Supplement: s1 [file s1]

# The Association between *ABCG2* 421C>A (rs2231142) Polymorphism and Rosuvastatin Pharmacokinetics: A Systematic Review and Meta-Analysis

Yubin Song <sup>†</sup>, Hee-Hyun Lim <sup>†</sup>, Jeong Yee, Ha-Young Yoon and Hye-Sun Gwak <sup>\*</sup>

College of Pharmacy and Graduate School of Pharmaceutical Sciences, Ewha Womans University, Seoul 03760, Korea; 1564069@ewhain.net (Y.S.); dlagmlgus000@ewhain.net (H.-H.L.); jijhello1@naver.com (J.Y.); hayoungdymphnayoon@gmail.com (H.-Y.Y.).

<sup>\*</sup> Correspondence: hsgwak@ewha.ac.kr; Tel.: +82-2-3277-4376

<sup>†</sup> These authors contributed equally to this work.

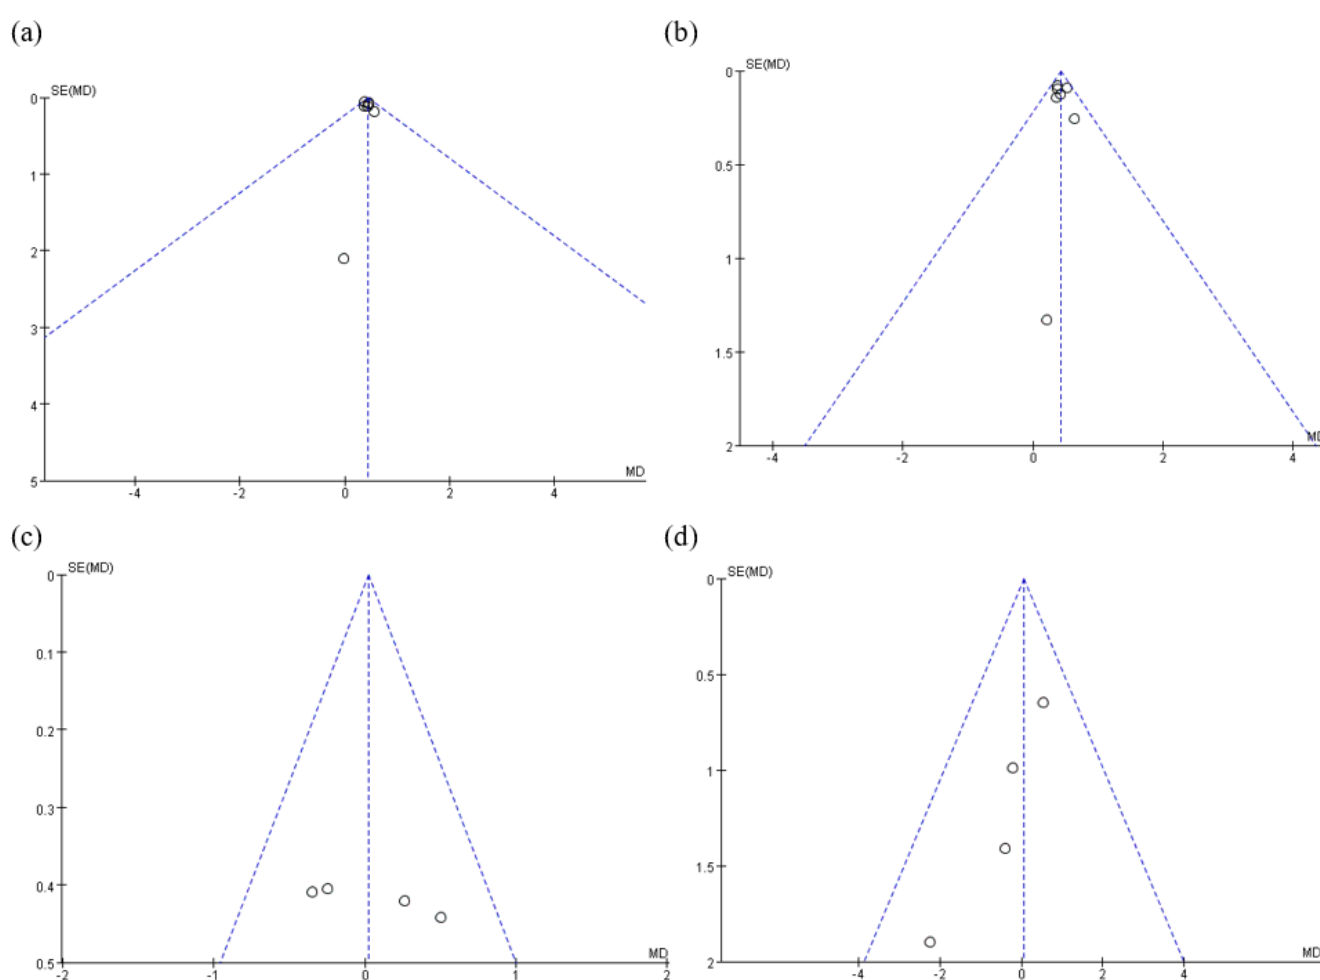

**Figure S1.** Funnel plot of effect of *ABCG2* 421C>A on rosuvastatin; (a)  $AUC_{0-\infty}$  (ng·h/ml), (b)  $C_{max}$  (ng/ml), (c)  $t_{max}$  (h), (d) half-life (h)

**Table S1.** AUC<sub>0-∞</sub> (ng·h/ml) and C<sub>max</sub> (ng/ml) of rosuvastatin between *ABCG2* 421 A allele carriers and GG genotype carriers

| Studies          | Dose (mg) | Type of mean | AUC <sub>0-∞</sub> (ng·h/mL) |     |                     |     | C <sub>max</sub> (ng/mL) |     |                     |     |
|------------------|-----------|--------------|------------------------------|-----|---------------------|-----|--------------------------|-----|---------------------|-----|
|                  |           |              | <i>ABCG2</i> 421 CA/AA       |     | <i>ABCG2</i> 421 CC |     | <i>ABCG2</i> 421 CA/AA   |     | <i>ABCG2</i> 421 CC |     |
|                  |           |              | Mean (SD)                    | N   | Mean (SD)           | N   | Mean (SD)                | N   | Mean (SD)           | N   |
| Birmingham 2015a | 20        | G            | 179.0 (1.5)                  | 33  | 114.0 (1.5)         | 54  | 18.8 (1.5)               | 33  | 11.1 (1.6)          | 54  |
| Birmingham 2015b | 20        | G            | 216.7 (1.5)                  | 60  | 148.8 (1.5)         | 78  | 23.4 (1.6)               | 60  | 15.9 (1.6)          | 78  |
| Huguet 2016      | 10        | G            | 26.9 (15.5)                  | 2   | 27.5 (20.3)         | 14  | N/A                      | N/A | N/A                 | N/A |
| Keskitalo 2009   | 20        | A            | 95.2 (32.1)                  | 16  | 62.3 (22.7)         | 16  | 10.0 (4.2)               | 16  | 7.1 (3.1)           | 16  |
| Kim 2017         | 20        | G            | N/A                          | N/A | N/A                 | N/A | 19.9 (10.7)              | 9   | 16.2 (8.4)          | 4   |
| Liu 2016         | 20        | A            | 239.4 (140.6)                | 34  | 153.8 (66.5)        | 27  | 25.3 (13.9)              | 34  | 16.2 (8.4)          | 27  |
| Wan 2015         | 10        | A            | 177.5 (58.0)                 | 34  | 112.7 (38.2)        | 28  | 16.5 (7.8)               | 34  | 10.9 (3.6)          | 28  |
| Zhang 2006       | 20        | A            | 62.2 (23.5)                  | 7   | 34.9 (11.9)         | 7   | 9.9 (5.4)                | 7   | 5.1 (2.4)           | 7   |

A: arithmetic mean; AUC: area under the curve; G: geometric mean; N/A: not available; SD: standard deviation.

**Table S2.** Sensitivity analysis of rosuvastatin AUC<sub>0-∞</sub> (ng·h/ml)

| Excluded study   | lnGM | 95% CI       | I <sup>2</sup> | GM: geometric mean difference;<br>CI: confidence interval |
|------------------|------|--------------|----------------|-----------------------------------------------------------|
| Birmingham 2015a | 0.42 | 0.33 to 0.51 | 0              |                                                           |
| Birmingham 2015b | 0.45 | 0.35 to 0.54 | 0              |                                                           |
| Huguet 2016      | 0.43 | 0.35 to 0.50 | 0              |                                                           |
| Keskitalo 2009   | 0.42 | 0.34 to 0.51 | 0              |                                                           |
| Kim 2017         | 0.43 | 0.35 to 0.50 | 0              |                                                           |
| Liu 2016         | 0.43 | 0.35 to 0.51 | 0              |                                                           |
| Wan 2015         | 0.42 | 0.33 to 0.50 | 0              |                                                           |
| Zhang 2006       | 0.42 | 0.34 to 0.50 | 0              |                                                           |
| TOTAL            | 0.43 | 0.35 to 0.50 | 0              |                                                           |

**Table S3.** Sensitivity analysis of rosuvastatin C<sub>max</sub> (ng/ml)

| Excluded study   | lnGM | 95% CI       | I <sup>2</sup> | GM: geometric mean difference;<br>CI: confidence interval |
|------------------|------|--------------|----------------|-----------------------------------------------------------|
| Birmingham 2015a | 0.39 | 0.29 to 0.49 | 0              |                                                           |
| Birmingham 2015b | 0.44 | 0.33 to 0.55 | 0              |                                                           |
| Keskitalo 2009   | 0.43 | 0.33 to 0.52 | 0              |                                                           |
| Kim 2017         | 0.42 | 0.33 to 0.51 | 0              |                                                           |
| Liu 2016         | 0.42 | 0.32 to 0.52 | 0              |                                                           |
| Wan 2015         | 0.44 | 0.34 to 0.54 | 0              |                                                           |
| Zhang 2006       | 0.41 | 0.32 to 0.50 | 0              |                                                           |
| TOTAL            | 0.42 | 0.33 to 0.51 | 0              |                                                           |

**Table S4.** Sensitivity analysis of rosuvastatin  $t_{\max}$  (h)

| Excluded study | AMD   | 95% CI        | I <sup>2</sup> | AMD: arithmetic mean difference;<br>CI: confidence interval |
|----------------|-------|---------------|----------------|-------------------------------------------------------------|
| Keskitalo 2009 | 0.12  | -0.36 to 0.59 | 8              |                                                             |
| Liu 2016       | -0.12 | -0.59 to 0.34 | 0              |                                                             |
| Wan 2015       | -0.06 | -0.53 to 0.41 | 14             |                                                             |
| Zhang 2006     | 0.15  | -0.33 to 0.63 | 0              |                                                             |
| TOTAL          | 0.02  | -0.39 to 0.43 | 0              |                                                             |

**Table S5.** Sensitivity analysis of rosuvastatin half-life (h)

| Excluded study | AMD   | 95% CI        | I <sup>2</sup> | AMD: arithmetic mean difference;<br>CI: confidence interval |
|----------------|-------|---------------|----------------|-------------------------------------------------------------|
| Keskitalo 2009 | 0.11  | -0.91 to 1.13 | 1              |                                                             |
| Liu 2016       | 0.21  | -0.78 to 1.20 | 0              |                                                             |
| Wan 2015       | -0.57 | -2.03 to 0.89 | 0              |                                                             |
| Zhang 2006     | 0.13  | -0.97 to 1.23 | 3              |                                                             |
| TOTAL          | 0.05  | -0.91 to 1.01 | 0              |                                                             |
